# Supplementary material for: Multi-Target Alternative Approaches to Promoting Fresh-Cut Carrots’ Bioactive and Fresh-like Quality
Source: MDPI journal article supplement (doi:10.3390/foods11162422), 2022-08-12
Supplement: s1 [file s1]

# Multi-Target Alternative Approaches to Promoting Fresh-Cut Carrots' Bioactive and Fresh-Like Quality

Carla Alegria<sup>1,2</sup>, Elsa M. Gonçalves<sup>3,4\*</sup>, Margarida Moldão-Martins<sup>5</sup>, Marta Abreu<sup>3,5\*</sup>

<sup>1</sup> SFCOLAB - Associação Smart Farm COLAB Laboratório Colaborativo para a Inovação Digital na Agricultura, Rua Cândido dos Reis nº1, Espaço SFCOLAB, 2560-312 Torres Vedras, Portugal

<sup>2</sup> cE3c – Centre for Ecology, Evolution and Environmental Changes & CHANGE - Global Change and Sustainability Institute, Faculdade de Ciências, Universidade de Lisboa, 1749-016 Lisboa, Portugal

<sup>3</sup> Unidade Tecnologia e Inovação, Instituto Nacional de Investigação Agrária e Veterinária, I.P.. Av. da República, Quinta do Marquês, 2780-157 Oeiras, Portugal

<sup>4</sup> GeoBioTec—Geobiociências, Geoengenharias e Geotecnologias, Faculdade de Ciências e Tecnologia, Universidade Nova de Lisboa, 2829-516 Caparica, Portugal

<sup>5</sup> LEAF—Linking Landscape, Environment, Agriculture and Food Research Center, Associated Laboratory TERRA, Instituto Superior de Agronomia, Universidade de Lisboa, Tapada da Ajuda, 1349-017 Lisboa, Portugal

\* Correspondence: elsa.goncalves@iniav.pt (E.M.G.); marta.abreu@iniav.pt (M.A.)

## Supplementary Material

### Tables

**Supplementary Material Table S1.** Factor loadings of the preliminary Principal Component Analysis (PCA) of the full data matrix (56 samples and 13 variables).

| Variable        | Factor 1  | Factor 2  | Factor 3  | Factor 4  |
|-----------------|-----------|-----------|-----------|-----------|
| TPC             | 0.202268  | -0.822794 | -0.335067 | 0.077934  |
| CA              | 0.121653  | -0.894850 | 0.212862  | 0.168795  |
| PAL             | 0.061471  | -0.859681 | 0.171582  | -0.290313 |
| TCC             | 0.383605  | 0.201281  | -0.502062 | 0.177074  |
| AOx             | 0.179585  | -0.552866 | -0.633246 | 0.218847  |
| pH              | 0.774382  | 0.142915  | -0.380450 | 0.052821  |
| SSC             | 0.360808  | -0.180590 | 0.609355  | 0.501420  |
| Rejection       | -0.901081 | -0.199603 | -0.011145 | 0.044524  |
| O <sub>2</sub>  | 0.758970  | -0.176641 | 0.133980  | -0.392505 |
| CO <sub>2</sub> | -0.860636 | 0.310495  | -0.116615 | 0.320082  |
| TAPC            | -0.878943 | -0.416320 | -0.052911 | 0.085895  |
| LAB             | -0.941584 | -0.147247 | -0.060289 | 0.053976  |
| Y&M             | -0.688761 | -0.031297 | -0.140881 | -0.569591 |

**Supplementary Material Table S2.** Used variable and sample codes for hierarchical cluster analysis and PCA analysis for overall quality assessment.

| <b>Variables</b>                              | <b>Codes</b>                                |
|-----------------------------------------------|---------------------------------------------|
| Total phenolic content                        | TPC                                         |
| PAL activity                                  | PAL                                         |
| Chlorogenic Acid                              | CA                                          |
| Total aerobic plate counts                    | TAPC                                        |
| Lactic acid bacteria counts                   | LAB                                         |
| Oxygen concentration                          | O <sub>2</sub>                              |
| Carbon dioxide concentration                  | CO <sub>2</sub>                             |
| pH                                            | pH                                          |
| Rejection index (sensorial)                   | Rejection                                   |
| <b>Samples</b>                                | <b>Codes</b>                                |
| Control (untreated) packed in film A_day 0-14 | CA0; CA3; CA5; CA7; CA10; CA12; CA14        |
| Control (untreated) packed in film B_day 0-14 | CB0; CB3; CB5; CB7; CB10; CB12; CB14        |
| Heat-treated packed in film A_day 0-14        | HA0; HA3; HA5; HA7; HA10; HA12; HA14        |
| Heat-treated packed in film B_day 0-14        | HB0; HB3; HB5; HB7; HB10; HB12 ;HB14        |
| UV-treated packed in film A_day 0-14          | UA0; UA3; UA5; UA7; UA10; UA12; UA14        |
| UV-treated packed in film B_day 0-14          | UB0; UB3; UB5; UB7; UB10; UB12; UB14        |
| HS x UV-treated packed in film A_day 0-14     | HUA0; HUA3; HUA5; HUA7; HUA10; HUA12; HUA14 |
| HS x UV-treated packed in film B_day 0-14     | HUB0; HUB3; HUB5; HUB7; HUB10; HUB12; HUB14 |

**Supplementary Material Table S3.** Changes in atmosphere composition (O<sub>2</sub> and CO<sub>2</sub>), total phenolic content (TPC), chlorogenic acid content (CA), PAL activity (PAL), pH, total aerobic plate count (TAPC), lactic acid bacteria (LAB) and yeast and moulds (Y&M) and rejection index (sensorial) of shredded carrot samples as affected by abiotic stress treatments and MAP conditions during low-temperature storage (5 °C, 14 days).

| Treatment | Packaging film | Storage (days) | O <sub>2</sub>                | CO <sub>2</sub>             | TPC                             | CA                            | PAL                            | pH                          | TAPC                      | LAB                                  | Y&M                                  | Rejection                |
|-----------|----------------|----------------|-------------------------------|-----------------------------|---------------------------------|-------------------------------|--------------------------------|-----------------------------|---------------------------|--------------------------------------|--------------------------------------|--------------------------|
| C         | A              | 0              | 21.0 <sup>r</sup> ±0.0        | 0.0 <sup>a</sup> ±0.0       | 57.67 <sup>cdefghi</sup> ±3.23  | 2.90 <sup>abcde</sup> ±0.01   | 30.47 <sup>abcd</sup> ±2.05    | 6.2 <sup>opqr</sup> ±0.0    | 4.3 <sup>defgh</sup> ±0.2 | 2.6 <sup>cdefgh</sup> ±0.1           | 3.2 <sup>bcddefghi</sup> ±0.2        | 1.2 <sup>ab</sup> ±0.4   |
|           |                | 3              | 0.5 <sup>ab</sup> ±0.5        | 20.3 <sup>klmno</sup> ±0.9  | 61.10 <sup>efghi</sup> ±3.32    | 2.64 <sup>ab</sup> ±0.02      | 72.57 <sup>defgh</sup> ±8.94   | 5.8 <sup>klmno</sup> ±0.1   | 6.1 <sup>ijkl</sup> ±0.1  | 4.9 <sup>ijklmn</sup> ±0.1           | 3.9 <sup>defghij</sup> ±0.2          | 1.2 <sup>ab</sup> ±0.3   |
|           |                | 5              | 0.0 <sup>a</sup> ±0.1         | 28.8 <sup>r</sup> ±1.2      | 81.60 <sup>ijklm</sup> ±2.25    | 3.04 <sup>abcdefg</sup> ±0.07 | 24.50 <sup>abc</sup> ±1.65     | 5.5 <sup>ghijk</sup> ±0.1   | 6.9 <sup>ijklm</sup> ±0.1 | 6.0 <sup>mno</sup> ±0.1              | 3.7 <sup>cdefghij</sup> ±0.3         | 2.4 <sup>de</sup> ±0.3   |
|           |                | 7              | 0.1 <sup>a</sup> ±0.2         | 30.0 <sup>s</sup> ±1.7      | 86.97 <sup>ijklm</sup> ±14.67   | 3.04 <sup>abcdefg</sup> ±0.16 | 25.07 <sup>abc</sup> ±1.55     | 6.3 <sup>r</sup> ±0.0       | 7.6 <sup>lmno</sup> ±0.1  | 7.0 <sup>opqu</sup> ±0.0             | 3.4 <sup>cdefghij</sup> ±0.4         | 3.6 <sup>hij</sup> ±0.4  |
|           |                | 10             | 0.0 <sup>a</sup> ±0.0         | 38.1 <sup>t</sup> ±0.9      | 42.63 <sup>abcde</sup> ±4.63    | 2.50 <sup>ab</sup> ±0.04      | 8.77 <sup>a</sup> ±1.06        | 5.3 <sup>efghi</sup> ±0.1   | 8.2 <sup>mno</sup> ±0.2   | 8.2 <sup>quv</sup> ±0.2              | 4.0 <sup>efghij</sup> ±0.4           | 3.9 <sup>k</sup> ±0.4    |
|           |                | 12             | 0.0 <sup>a</sup> ±0.0         | 39.3 <sup>t</sup> ±1.4      | 35.83 <sup>abcd</sup> ±0.21     | 3.01 <sup>abcdefg</sup> ±0.04 | 12.40 <sup>a</sup> ±1.61       | 4.7 <sup>bc</sup> ±0.0      | 8.6 <sup>no</sup> ±0.1    | 8.5 <sup>uv</sup> ±0.1               | 4.4 <sup>ghij</sup> ±0.3             | 4.4 <sup>kl</sup> ±0.3   |
|           |                | 14             | 0.0 <sup>a</sup> ±0.1         | 42.3 <sup>t</sup> ±0.9      | 32.80 <sup>ab</sup> ±0.66       | 2.31 <sup>a</sup> ±0.06       | 11.83 <sup>a</sup> ±1.42       | 4.2 <sup>a</sup> ±0.0       | 8.9 <sup>o</sup> ±0.1     | 8.8 <sup>v</sup> ±0.1                | 4.8 <sup>ij</sup> ±0.1               | 4.9 <sup>±</sup> 0.2     |
|           | B              | 0              | 21.0 <sup>r</sup> ±0.0        | 0.0 <sup>a</sup> ±0.0       | 56.33 <sup>bcddefgh</sup> ±2.20 | 2.90 <sup>abcdef</sup> ±0.03  | 31.30 <sup>abcde</sup> ±2.95   | 6.2 <sup>pqr</sup> ±0.1     | 4.1 <sup>cdefg</sup> ±0.1 | 2.6 <sup>cdefgh</sup> ±0.2           | 3.3 <sup>bcddefghi</sup> ±0.1        | 1.1 <sup>a</sup> ±0.2    |
|           |                | 3              | 7.5 <sup>efghijkl</sup> ±1.8  | 10.3 <sup>efgh</sup> ±0.5   | 67.97 <sup>ghijk</sup> ±6.38    | 4.31 <sup>hij</sup> ±0.02     | 212.57 <sup>Pq</sup> ±26.76    | 5.8 <sup>klmno</sup> ±0.0   | 6.1 <sup>ijkl</sup> ±0.3  | 4.9 <sup>ijklm</sup> ±0.3            | 4.3 <sup>fghij</sup> ±0.0            | 1.2 <sup>ab</sup> ±0.3   |
|           |                | 5              | 6.3 <sup>cdefghij</sup> ±1.6  | 13.2 <sup>ghi</sup> ±1.4    | 89.63 <sup>klmn</sup> ±7.22     | 3.62 <sup>cdefghi</sup> ±0.02 | 129.93 <sup>klm</sup> ±17.57   | 5.5 <sup>fghijk</sup> ±0.0  | 7.1 <sup>klmn</sup> ±0.2  | 5.6 <sup>klmno</sup> ±0.3            | 4.1 <sup>efghij</sup> ±0.2           | 2.2 <sup>k</sup> ±0.3    |
|           |                | 7              | 4.0 <sup>abcdefg</sup> ±0.9   | 16.5 <sup>ijk</sup> ±2.2    | 111.93 <sup>nopq</sup> ±20.46   | 6.00 <sup>mn</sup> ±0.09      | 165.03 <sup>mno</sup> ±8.89    | 6.1 <sup>mnopqr</sup> ±0.0  | 8 <sup>mno</sup> ±0.2     | 6.3 <sup>mnop</sup> ±0.2             | 3.9 <sup>defghij</sup> ±0.4          | 3.1 <sup>fghi</sup> ±0.2 |
|           |                | 10             | 2.1 <sup>abcd</sup> ±0.8      | 19.1 <sup>ijklm</sup> ±1.4  | 98.63 <sup>lmno</sup> ±12.88    | 7.61 <sup>P</sup> ±0.55       | 232.00 <sup>Pqr</sup> ±8.18    | 5.6 <sup>hijk</sup> ±0.1    | 8.9 <sup>o</sup> ±0.3     | 6.8 <sup>opqu</sup> ±0.4             | 5.2 <sup>±</sup> 0.2                 | 3.5 <sup>hij</sup> ±0.4  |
|           |                | 12             | 1.5 <sup>abc</sup> ±0.6       | 18.9 <sup>ijklm</sup> ±1.6  | 80.20 <sup>hijklm</sup> ±15.80  | 7.46 <sup>oP</sup> ±0.18      | 76.23 <sup>efghi</sup> ±9.86   | 5.4 <sup>efghij</sup> ±0.0  | 8.9 <sup>o</sup> ±0.2     | 6.7 <sup>nopq</sup> ±0.3             | 5.2 <sup>±</sup> 0.2                 | 4.2 <sup>k</sup> ±0.3    |
|           |                | 14             | 5.2 <sup>bcddefghi</sup> ±4.3 | 14.8 <sup>hij</sup> ±4.8    | 102.67 <sup>mnoP</sup> ±12.80   | 7.97 <sup>P</sup> ±0.19       | 268.87 <sup>±</sup> 14.14      | 4.8 <sup>cd</sup> ±0.2      | 8.9 <sup>o</sup> ±0.1     | 6.6 <sup>nopq</sup> ±0.2             | 5.2 <sup>±</sup> 0.3                 | 4.9 <sup>±</sup> 0.2     |
| H         | A              | 0              | 21.0 <sup>r</sup> ±0.0        | 0.0 <sup>a</sup> ±0.0       | 53.87 <sup>bcd</sup> ±2.65      | 2.70 <sup>abc</sup> ±0.05     | 27.13 <sup>abc</sup> ±2.20     | 6.3 <sup>qr</sup> ±0.1      | 2.6 <sup>abc</sup> ±0.1   | <10 <sup>1</sup> CFU.g <sup>-1</sup> | <10 <sup>1</sup> CFU.g <sup>-1</sup> | 1.0 <sup>a</sup> ±0.0    |
|           |                | 3              | 2.2 <sup>abcd</sup> ±0.2      | 6.3 <sup>bcd</sup> ±1.7     | 68.10 <sup>efghijk</sup> ±8.16  | 2.73 <sup>abc</sup> ±0.01     | 63.43 <sup>cdefg</sup> ±7.99   | 6.0 <sup>lmnopqr</sup> ±0.0 | 3.7 <sup>bcd</sup> ±0.5   | 1.4 <sup>abc</sup> ±0.1              | <10 <sup>1</sup> CFU.g <sup>-1</sup> | 1.1 <sup>a</sup> ±0.2    |
|           |                | 5              | 1.1 <sup>ab</sup> ±0.1        | 8.7 <sup>cdefg</sup> ±0.9   | 88.40 <sup>klmn</sup> ±8.91     | 2.80 <sup>abcd</sup> ±0.03    | 18.80 <sup>abc</sup> ±2.33     | 6.1 <sup>mnopqr</sup> ±0.1  | 4.6 <sup>defgh</sup> ±0.5 | 2.2 <sup>bcd</sup> ±0.6              | <10 <sup>1</sup> CFU.g <sup>-1</sup> | 1.3 <sup>ab</sup> ±0.2   |
|           |                | 7              | 2.6 <sup>abcde</sup> ±1.6     | 16.8 <sup>ijkl</sup> ±0.8   | 97.17 <sup>lmno</sup> ±1.79     | 2.93 <sup>abcdefg</sup> ±0.09 | 20.60 <sup>abc</sup> ±1.47     | 6.4 <sup>t</sup> ±0.0       | 5.5 <sup>ghij</sup> ±0.2  | 2.9 <sup>cdefgh</sup> ±0.4           | <10 <sup>1</sup> CFU.g <sup>-1</sup> | 1.5 <sup>abc</sup> ±0.4  |
|           |                | 10             | 1.8 <sup>abcd</sup> ±1.1      | 23.3 <sup>mnopq</sup> ±1.7  | 55.90 <sup>bcd</sup> ±2.09      | 3.32 <sup>bcd</sup> ±0.10     | 35.77 <sup>abcde</sup> ±4.68   | 6.3 <sup>qr</sup> ±0.1      | 6.2 <sup>ijkl</sup> ±0.6  | 3.5 <sup>defghi</sup> ±1.7           | <10 <sup>1</sup> CFU.g <sup>-1</sup> | 2 <sup>cd</sup> ±0.3     |
|           |                | 12             | 0.1 <sup>a</sup> ±0.1         | 23.6 <sup>mnopqr</sup> ±0.5 | 34.67 <sup>abcd</sup> ±1.50     | 3.32 <sup>bcd</sup> ±0.02     | 18.70 <sup>abc</sup> ±0.30     | 5.4 <sup>efghij</sup> ±0.0  | 6.3 <sup>ijkl</sup> ±0.5  | 4.4 <sup>hijkl</sup> ±0.6            | <10 <sup>1</sup> CFU.g <sup>-1</sup> | 2.5 <sup>de</sup> ±0.2   |
|           |                | 14             | 0.1 <sup>a</sup> ±0.0         | 25.3 <sup>opqrs</sup> ±2.0  | 33.07 <sup>ab</sup> ±1.01       | 2.89 <sup>abcde</sup> ±0.05   | 26.47 <sup>abc</sup> ±1.95     | 5.4 <sup>efghij</sup> ±0.2  | 6.4 <sup>ijkl</sup> ±1.3  | 5.3 <sup>ijklmno</sup> ±0.7          | <10 <sup>1</sup> CFU.g <sup>-1</sup> | 2.9 <sup>efg</sup> ±0.2  |
|           | B              | 0              | 21.0 <sup>r</sup> ±0.0        | 0.0 <sup>a</sup> ±0.0       | 55.40 <sup>bcd</sup> ±3.51      | 3.70 <sup>defghi</sup> ±0.03  | 34.37 <sup>abcde</sup> ±2.11   | 6.2 <sup>pqr</sup> ±0.1     | 2.4 <sup>ab</sup> ±0.3    | 0.7 <sup>ab</sup> ±0.6               | <10 <sup>1</sup> CFU.g <sup>-1</sup> | 1.0 <sup>a</sup> ±0.0    |
|           |                | 3              | 14.3 <sup>opq</sup> ±0.4      | 6.1 <sup>bcd</sup> ±0.1     | 50.77 <sup>abcde</sup> ±6.43    | 3.77 <sup>efghi</sup> ±0.01   | 159.87 <sup>lmn</sup> ±29.54   | 6.0 <sup>lmnopqr</sup> ±0.1 | 3.5 <sup>bcd</sup> ±0.6   | 1.9 <sup>bcd</sup> ±0.3              | <10 <sup>1</sup> CFU.g <sup>-1</sup> | 1.1 <sup>a</sup> ±0.2    |
|           |                | 5              | 9.5 <sup>hijklmno</sup> ±1.9  | 9.0 <sup>cdefg</sup> ±0.7   | 94.30 <sup>lmno</sup> ±3.60     | 5.32 <sup>klm</sup> ±0.10     | 60.37 <sup>bcd</sup> ±3.84     | 6.0 <sup>lmnopqr</sup> ±0.2 | 4.5 <sup>defgh</sup> ±0.5 | 3.1 <sup>defghi</sup> ±0.6           | <10 <sup>1</sup> CFU.g <sup>-1</sup> | 1.2 <sup>ab</sup> ±0.2   |
|           |                | 7              | 12.7 <sup>nopq</sup> ±2.3     | 7.1 <sup>bcd</sup> ±1.7     | 133.67 <sup>qrst</sup> ±6.65    | 9.14 <sup>±</sup> 0.21        | 115.27 <sup>hijkl</sup> ±16.88 | 6.2 <sup>pqr</sup> ±0.1     | 5.5 <sup>ghij</sup> ±1.0  | 4.2 <sup>hijkl</sup> ±1.6            | <10 <sup>1</sup> CFU.g <sup>-1</sup> | 1.3 <sup>ab</sup> ±0.4   |
|           |                | 10             | 11.0 <sup>klmnop</sup> ±0.6   | 8.1 <sup>bcd</sup> ±0.1     | 143.17 <sup>±</sup> 4.46        | 11.77 <sup>t</sup> ±0.17      | 144.67 <sup>klm</sup> ±24.82   | 6.0 <sup>lmnopqr</sup> ±0.2 | 6.9 <sup>ijklm</sup> ±0.3 | 3.6 <sup>efghij</sup> ±0.1           | <10 <sup>1</sup> CFU.g <sup>-1</sup> | 1.7 <sup>bc</sup> ±0.3   |
|           |                | 12             | 11.7 <sup>klmnopq</sup> ±0.3  | 8.9 <sup>cdefg</sup> ±0.5   | 94.40 <sup>lmno</sup> ±0.26     | 15.97 <sup>±</sup> 1.06       | 217.50 <sup>Pq</sup> ±22.12    | 6.1 <sup>nopqr</sup> ±0.1   | 7.1 <sup>klmn</sup> ±0.5  | 3.5 <sup>defghi</sup> ±0.6           | <10 <sup>1</sup> CFU.g <sup>-1</sup> | 2.1 <sup>cd</sup> ±0.2   |
|           |                | 14             | 13.6 <sup>nopq</sup> ±3.7     | 6.5 <sup>bcd</sup> ±2.8     | 117.63 <sup>opqr</sup> ±0.47    | 21.16 <sup>u</sup> ±0.98      | 201.90 <sup>mn</sup> ±4.95     | 5.2 <sup>defg</sup> ±0.0    | 7.2 <sup>klmn</sup> ±0.6  | 3.4 <sup>defghi</sup> ±0.6           | <10 <sup>1</sup> CFU.g <sup>-1</sup> | 2.5 <sup>de</sup> ±0.4   |
| U         | A              | 0              | 21.0 <sup>r</sup> ±0.0        | 0.0 <sup>a</sup> ±0.0       | 53.97 <sup>bcd</sup> ±2.06      | 2.63 <sup>ab</sup> ±0.02      | 53.57 <sup>abcde</sup> ±9.28   | 6.2 <sup>opqr</sup> ±0.0    | 3.9 <sup>bcd</sup> ±0.2   | 2.3 <sup>bcd</sup> ±0.2              | 3.2 <sup>bcddefghi</sup> ±0.1        | 1.0 <sup>a</sup> ±0.0    |
|           |                | 3              | 1.3 <sup>abc</sup> ±2.1       | 22.0 <sup>lmnop</sup> ±2.7  | 58.17 <sup>defghi</sup> ±10.34  | 2.63 <sup>ab</sup> ±0.05      | 74.73 <sup>defgh</sup> ±8.66   | 5.9 <sup>klmnopq</sup> ±0.1 | 5.8 <sup>hijk</sup> ±0.1  | 5 <sup>ijklmn</sup> ±0.2             | 4.3 <sup>fghi</sup> ±0.2             | 1.2 <sup>ab</sup> ±0.3   |
|           |                | 5              | 0.4 <sup>ab</sup> ±0.6        | 27.8 <sup>qrs</sup> ±1.4    | 78.93 <sup>ghijklm</sup> ±8.51  | 2.99 <sup>abcdefg</sup> ±0.03 | 27.20 <sup>abc</sup> ±4.46     | 6.0 <sup>lmnopqr</sup> ±0.1 | 6.5 <sup>ijkl</sup> ±0.1  | 5.9 <sup>mno</sup> ±0.3              | 3.8 <sup>defghij</sup> ±0.2          | 2.2 <sup>d</sup> ±0.2    |
|           |                | 7              | 0.4 <sup>ab</sup> ±0.2        | 30.2 <sup>±</sup> 3.7       | 81.77 <sup>ijklm</sup> ±9.28    | 3.15 <sup>abcde</sup> ±0.03   | 25.23 <sup>abc</sup> ±1.31     | 6.3 <sup>t</sup> ±0.1       | 7.1 <sup>klmn</sup> ±0.2  | 6.8 <sup>opqu</sup> ±0.3             | 3.2 <sup>bcddefghi</sup> ±0.2        | 3.2 <sup>fghi</sup> ±0.3 |
|           |                | 10             | 0.0 <sup>a</sup> ±0.0         | 38.6 <sup>t</sup> ±1.5      | 44.17 <sup>abcde</sup> ±1.68    | 3.03 <sup>abcde</sup> ±0.02   | 26.23 <sup>abc</sup> ±1.70     | 5.7 <sup>ijklmn</sup> ±0.2  | 8.1 <sup>mno</sup> ±0.2   | 8.0 <sup>pquv</sup> ±0.5             | 4.0 <sup>efghij</sup> ±0.0           | 3.6 <sup>±</sup> 0.2     |
|           |                | 12             | 0.0 <sup>a</sup> ±0.0         | 38.4 <sup>t</sup> ±1.4      | 40.10 <sup>abcde</sup> ±0.36    | 3.20 <sup>abcde</sup> ±0.04   | 25.00 <sup>abc</sup> ±2.86     | 5.4 <sup>efghij</sup> ±0.0  | 8.4 <sup>no</sup> ±0.1    | 8.3 <sup>uv</sup> ±0.3               | 4.3 <sup>fghij</sup> ±0.2            | 4.0 <sup>k</sup> ±0.2    |
|           |                | 14             | 0.0 <sup>a</sup> ±0.0         | 43.1 <sup>t</sup> ±1.2      | 53.03 <sup>abcde</sup> ±0.06    | 3.13 <sup>abcde</sup> ±0.12   | 26.63 <sup>abc</sup> ±4.85     | 4.3 <sup>ab</sup> ±0.0      | 8.6 <sup>no</sup> ±0.1    | 8.5 <sup>uv</sup> ±0.2               | 4.5 <sup>ghij</sup> ±0.3             | 4.4 <sup>kl</sup> ±0.4   |
|           | B              | 0              | 21.0 <sup>r</sup> ±0.0        | 0.0 <sup>a</sup> ±0.0       | 56.17 <sup>bcd</sup> ±2.53      | 3.84 <sup>ghi</sup> ±0.14     | 62.87 <sup>cdefg</sup> ±8.14   | 6.2 <sup>opqr</sup> ±0.0    | 3.6 <sup>bcd</sup> ±0.2   | 1.9 <sup>bcd</sup> ±0.1              | 3.0 <sup>bcd</sup> ±0.2              | 1.0 <sup>a</sup> ±0.0    |
|           |                | 3              | 10.5 <sup>klmnop</sup> ±2.3   | 8.0 <sup>bcd</sup> ±1.4     | 56.70 <sup>bcd</sup> ±1.32      | 4.49 <sup>ijk</sup> ±0.27     | 214.13 <sup>Pq</sup> ±25.03    | 5.9 <sup>klmnopq</sup> ±0.1 | 5.8 <sup>hijk</sup> ±0.3  | 3.8 <sup>ghij</sup> ±0.1             | 3.6 <sup>cdefghij</sup> ±0.5         | 1.2 <sup>ab</sup> ±0.3   |
|           |                | 5              | 12.9 <sup>nopq</sup> ±2.3     | 7.4 <sup>bcd</sup> ±2.0     | 78.20 <sup>ghijkl</sup> ±1.21   | 5.70 <sup>lmn</sup> ±0.09     | 103.03 <sup>ghijk</sup> ±14.38 | 5.8 <sup>ijklmno</sup> ±0.1 | 6.5 <sup>ijkl</sup> ±0.3  | 3.9 <sup>ghijk</sup> ±0.5            | 2.8 <sup>bcd</sup> ±0.5              | 2.2 <sup>d</sup> ±0.2    |
|           |                | 7              | 1.7 <sup>abc</sup> ±0.6       | 18.4 <sup>ijklm</sup> ±0.8  | 88.50 <sup>klmn</sup> ±5.00     | 8.17 <sup>P</sup> ±0.28       | 133.70 <sup>klm</sup> ±19.91   | 6.1 <sup>mnopqr</sup> ±0.0  | 7.2 <sup>klmn</sup> ±0.5  | 4.0 <sup>ghijk</sup> ±1.2            | 1.9 <sup>bc</sup> ±1.5               | 3.1 <sup>fghi</sup> ±0.2 |
|           |                | 10             | 15.2 <sup>pq</sup> ±1.5       | 5.1 <sup>abcd</sup> ±0.6    | 135.27 <sup>qrst</sup> ±13.41   | 10.00 <sup>±</sup> 0.22       | 250.73 <sup>qr</sup> ±16.38    | 5.7 <sup>ijklm</sup> ±0.2   | 8.6 <sup>no</sup> ±0.2    | 5.8 <sup>lmno</sup> ±0.3             | 4.6 <sup>hij</sup> ±0.1              | 3.3 <sup>ghi</sup> ±0.3  |
|           |                | 12             | 9.8 <sup>ijklmno</sup> ±4.3   | 9.3 <sup>cdefg</sup> ±4.0   | 91.53 <sup>klmn</sup> ±8.80     | 11.43 <sup>r</sup> ±0.06      | 217.13 <sup>Pq</sup> ±23.91    | 5.1 <sup>cd</sup> ±0.6      | 8.7 <sup>±</sup> 0.3      | 5.8 <sup>lmno</sup> ±0.5             | 4.8 <sup>±</sup> 0.5                 | 3.8 <sup>k</sup> ±0.2    |
|           |                | 14             | 1.4 <sup>abc</sup> ±0.5       | 18.8 <sup>ijklm</sup> ±1.0  | 99.47 <sup>lmno</sup> ±15.94    | 9.29 <sup>±</sup> 0.28        | 220.20 <sup>Pq</sup> ±21.67    | 5.0 <sup>cd</sup> ±0.1      | 8.8 <sup>±</sup> 0.3      | 5.7 <sup>klmno</sup> ±0.8            | 4.9 <sup>±</sup> 0.3                 | 4.2 <sup>k</sup> ±0.3    |
| HU        | A              | 0              | 21.0 <sup>r</sup> ±0.0        | 0.0 <sup>a</sup> ±0.0       | 52.67 <sup>abcde</sup> ±1.62    | 4.42 <sup>ijk</sup> ±0.10     | 39.83 <sup>abcde</sup> ±7.48   | 6.2 <sup>pqr</sup> ±0.1     | 1.9 <sup>a</sup> ±0.4     | <10 <sup>1</sup> CFU.g <sup>-1</sup> | <10 <sup>1</sup> CFU.g <sup>-1</sup> | 1.0 <sup>a</sup> ±0.0    |
|           |                | 3              | 3.4 <sup>abcde</sup> ±0.4     | 12.4 <sup>fghi</sup> ±0.4   | 63.60 <sup>efghij</sup> ±1.97   | 3.41 <sup>bcd</sup> ±0.03     | 92.33 <sup>fghij</sup> ±7.34   | 6.0 <sup>lmnopqr</sup> ±0.0 | 4.1 <sup>cdefg</sup> ±0.3 | 1.5 <sup>abc</sup> ±0.4              | <10 <sup>1</sup> CFU.g <sup>-1</sup> | 1.1 <sup>a</sup> ±0.2    |
|           |                | 5              | 2.4 <sup>abcd</sup> ±1.5      | 19.7 <sup>klmn</sup> ±2.5   | 78.37 <sup>ghijkl</sup> ±3.46   | 3.82 <sup>fghi</sup> ±0.05    | 31.33 <sup>abcde</sup> ±3.02   | 6.2 <sup>opqr</sup>         |                           |                                      |                                      |                          |

Figures

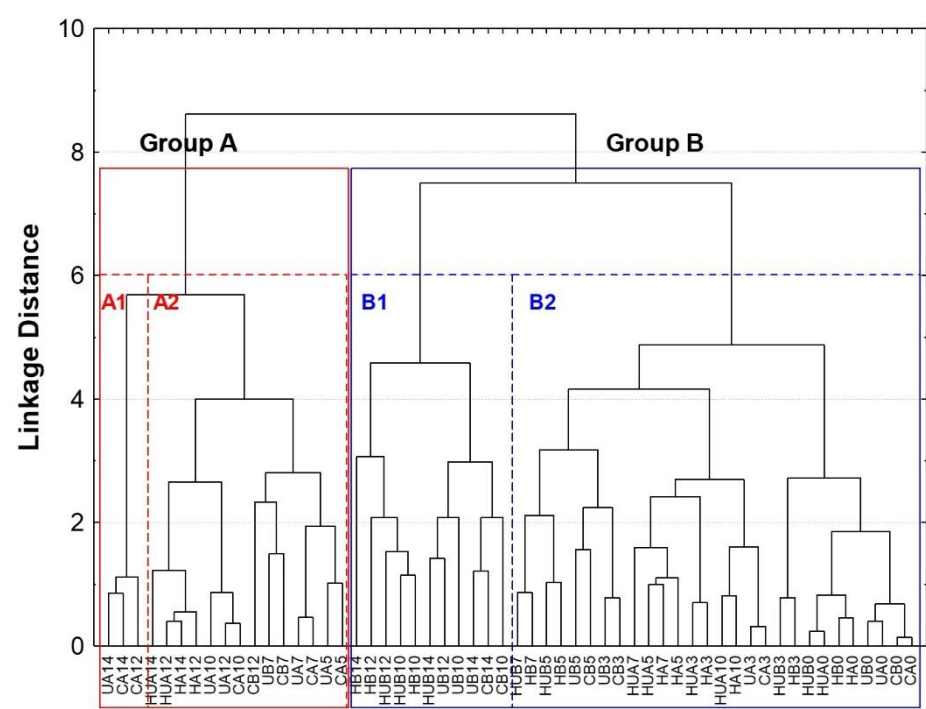

Supplementary Material Figure S1. Hierarchical cluster analysis dendrogram of the data matrix.
